# Supplementary material for: Synthesis and fluorescence properties of europium complex functionalized fiberglass paper
Source: Royal Society of Chemistry journal article supplement (doi:10.1039/d4ra05143b), 2024-01-01
Supplement: d4ra05143b1.zip [file d4ra05143b1.zip]

## Sheet: Sheet1
有机元素分析测试结果报告
实验基本信息
检测项目	有机元素分析仪
订单编号	2409110808
样品数量	1
测试模式	CHNS模式
检测日期	240914
仪器型号	Elementar UNICUBE
样品编号	N（%）	C（%）	H（%）	S（%）
Eu（TTA）3	0	33.429	2.34	11.322
Eu（TTA）3	0	33.357	2.299	11.385
